# Supplementary material for: Heme Competition Triggers an Increase in the Pathogenic Potential of Porphyromonas gingivalis in Porphyromonas gingivalis-Candida albicans Mixed Biofilm
Source: PubMed Central journal article supplement (PMC7738433; doi:10.3389/fmicb.2020.596459), 2020-12-02
Supplement: Data_Sheet_1.pdf [file Data_Sheet_1.pdf]

## Supplemental Materials

### 1. Separation of *P. gingivalis* and *C. albicans*

The microbes were separated by Percoll gradient centrifugation (Percoll, Sigma Aldrich, P1644). The four stock solutions of 50, 60, 70 and 80% Percoll were prepared with PBS, and 2ml of each solution was manually layered after wetting the centrifuge tube with FBS. The mixed biofilm of *P. gingivalis* and *C. albicans* was collected, dissolved in 2 ml of ice-cold stop buffer, and ultrasonically oscillated for 10 s. The solution of dual-species biofilm was placed at the top of the gradients, which were centrifuged at  $300 \times g$  for 5 min and  $8,000 \times g$  for 10 min using a fixed-angle rotor at  $4^\circ\text{C}$ . Finally, the top (*P. gingivalis*) and lower (*C. albicans*) fractions were collected and washed twice with 5ml PBS.

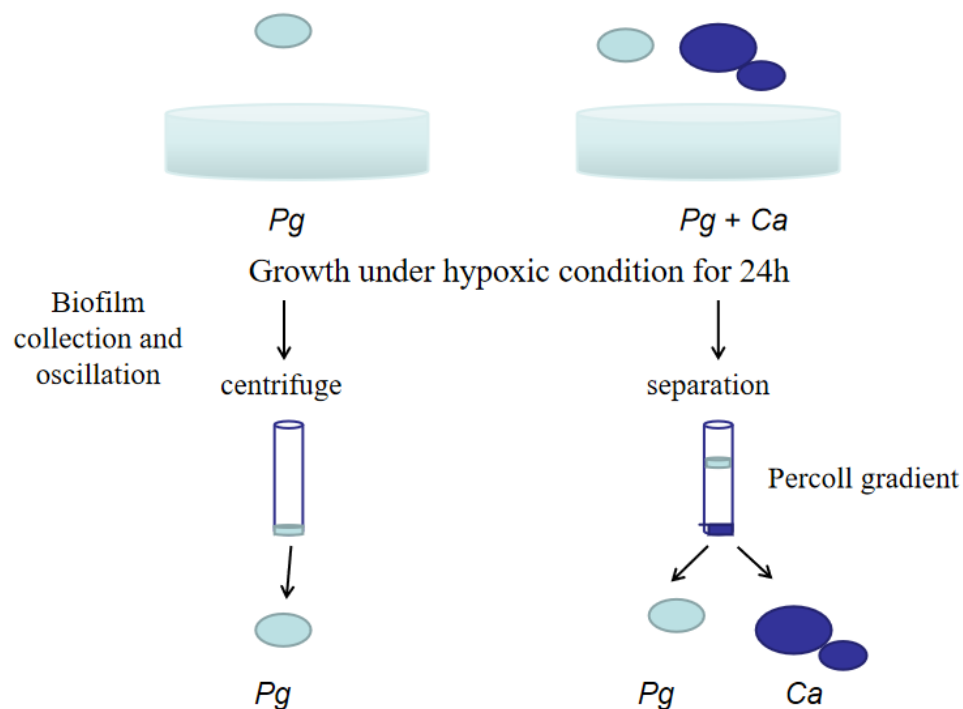

### 2. Gram stain of *C. albicans* and *P. gingivalis*

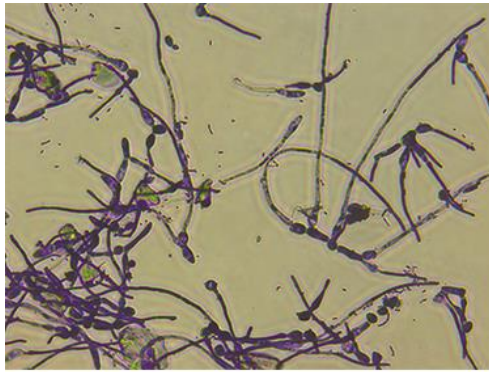

*C. albicans*

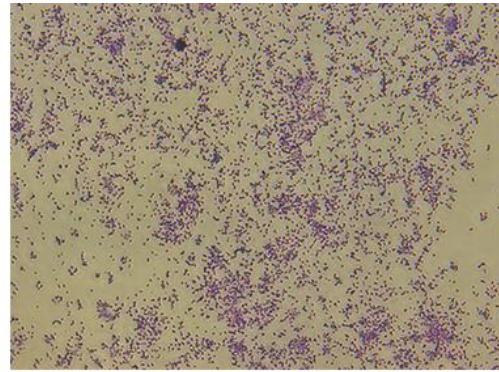

*P. gingivalis*

Microorganisms were separated from the dual-species biofilm and stained with Gram. Microscopic images of *C.albicans* (Left) and *P. gingivalis* (Right) were shown above.

### 3. Statistical data of *Candida albicans*

In Figure 1A, CFU of *C. albicans* decreased at 36h and 48h, with statistical difference ( $P < 0.05$ ) .

| Time | Mean $\pm$ s.d    | P        |
|------|-------------------|----------|
| 36h  | 6.812 $\pm$ 0.027 | P=0.0299 |
| 48h  | 6.652 $\pm$ 0.034 |          |

### 4. CFU of *P. gingivalis* after serum treatment

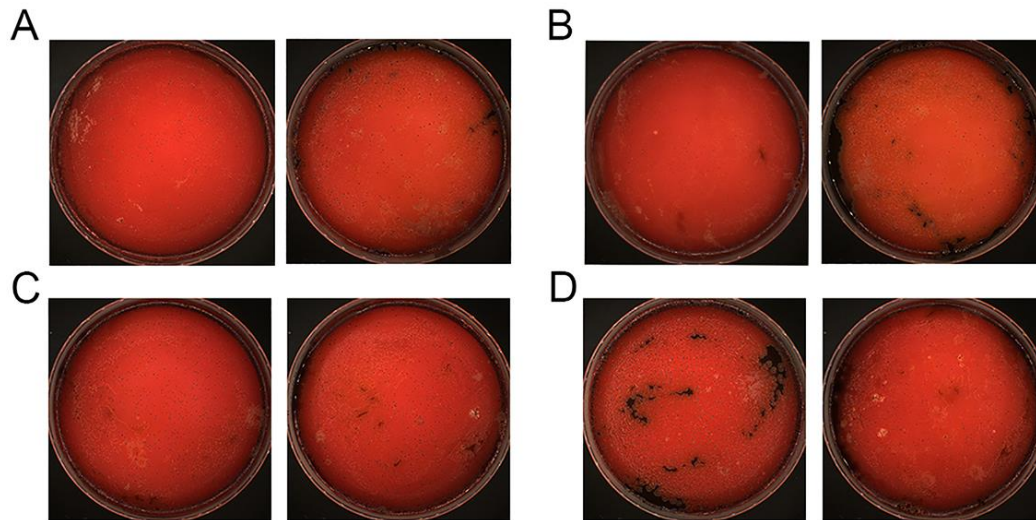

*P. gingivalis* separated from biofilms were treated in serum and cultured on BHI plates for 7 days. Growth of *P. gingivalis* treated with heat-inactivated serum (left) or serum from healthy volunteers (right). (A) *P. gingivalis* in dual-species biofilm under low heme condition. (B) *P. gingivalis* in single-species biofilm under low heme condition. (C) *P. gingivalis* in dual-species biofilm under high heme condition. (D) *P. gingivalis* in single-species biofilm under high heme condition.
